# Supplementary material
Source: ML conference proceedings conference paper supplement (https://www.ecva.net/papers/eccv_2020/papers_ECCV/html/123610154_ECCV_2020_paper.php)
Supplement: Supplementary file 1 [file 123610154-supp.zip]

## GT action: **pour oil**

$\tau_\alpha=2s$

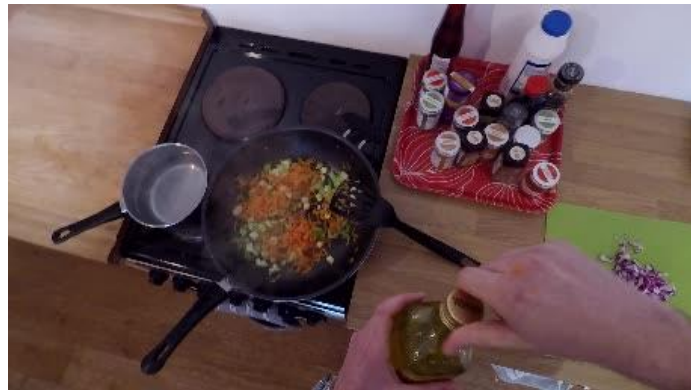

**pour oil**, put-down oil, close oil, turn-on hob, adjust hob

$\tau_\alpha=1.5s$

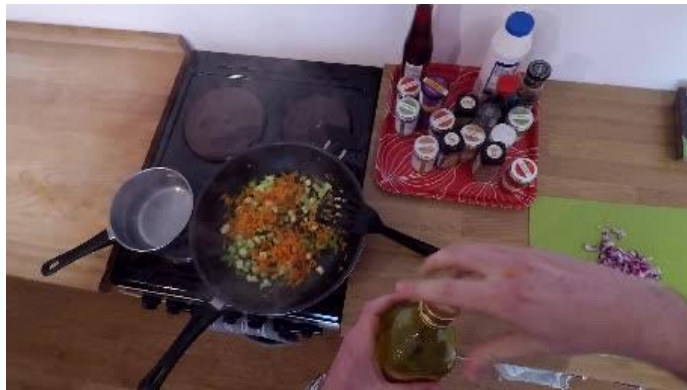

**pour oil**, put-down oil, close oil, take spoon, put-down pan

$\tau_\alpha=1s$

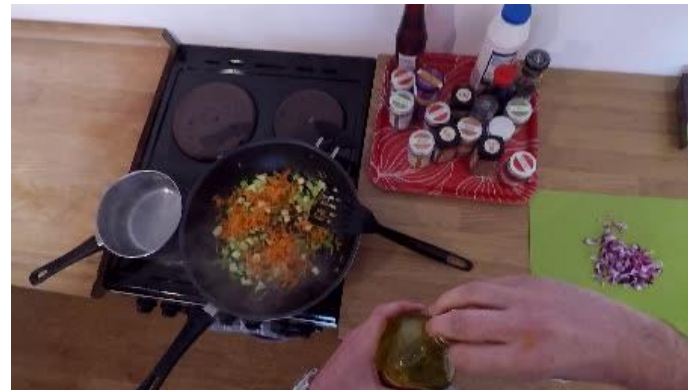

**pour oil**, put-down oil, close oil, pour salt, pour pepper

$\tau_\alpha=0.5s$

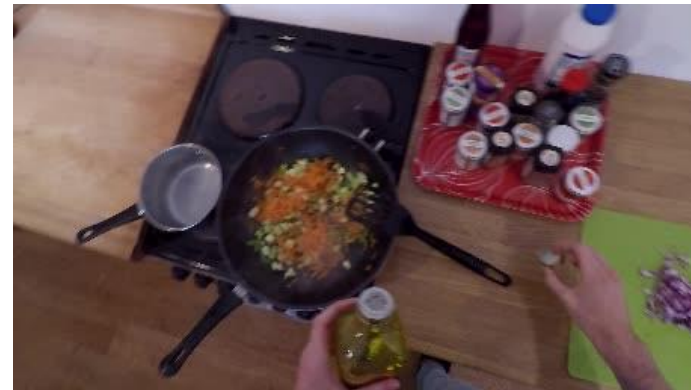

**pour oil**, put-down oil, adjust hob, pour pepper, put lid
