# Supplementary material
Source: ML conference proceedings conference paper supplement (https://www.ecva.net/papers/eccv_2020/papers_ECCV/html/123610154_ECCV_2020_paper.php)
Supplement: Supplementary file 4 [file 123610154-supp.zip]

## GT action: **roll dough**

$\tau_\alpha=2s$

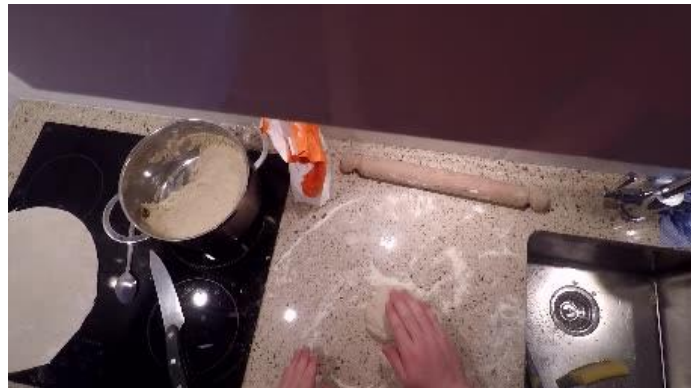

put dough, knead dough, **roll dough**, take flour, spread flour

$\tau_\alpha=1.5s$

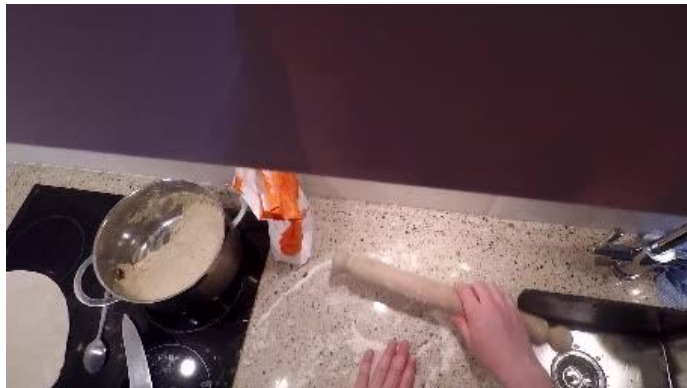

put dough, knead dough, **roll dough**, take dough, squeeze dough

$\tau_\alpha=1s$

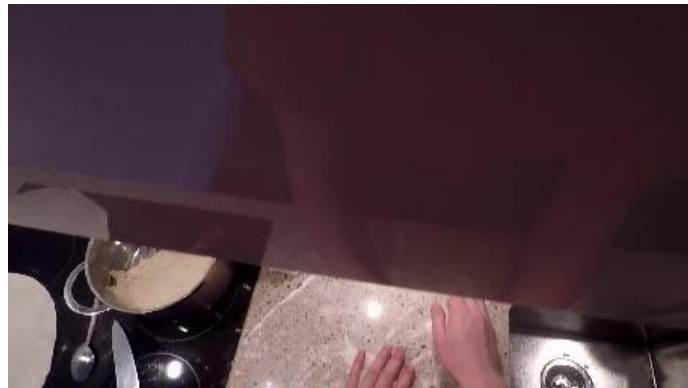

**roll dough**, put dough, take dough, rub hand, knead dough

$\tau_\alpha=0.5s$

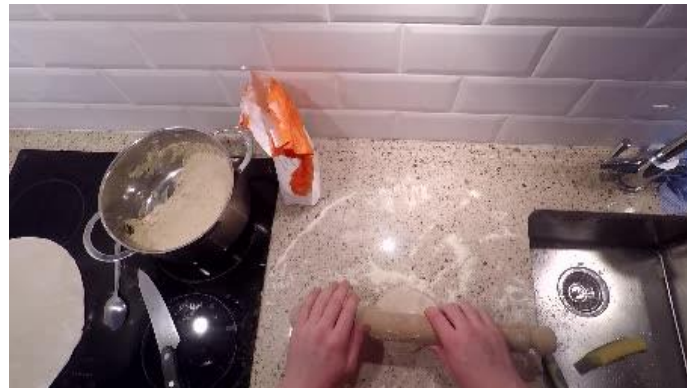

**roll dough**, put dough, brush flour, squeeze dough, knead dough
