# Supplementary material
Source: ML conference proceedings conference paper supplement (https://www.ecva.net/papers/eccv_2020/papers_ECCV/html/123610154_ECCV_2020_paper.php)
Supplement: Supplementary file 9 [file 123610154-supp.zip]

## GT action: **open fridge**

$\tau_\alpha=2s$

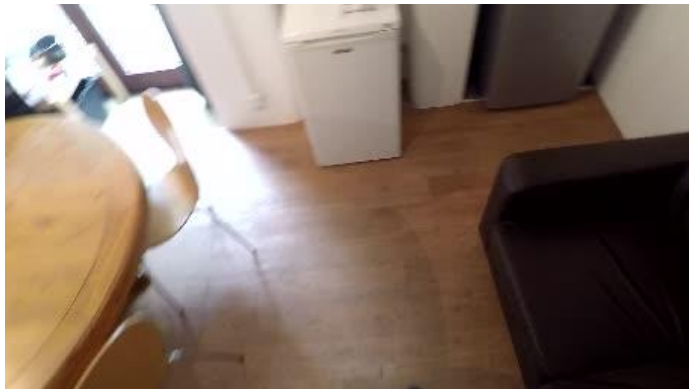

**open fridge**, open door, open drawer, take plate, rinse hand

$\tau_\alpha=1.5s$

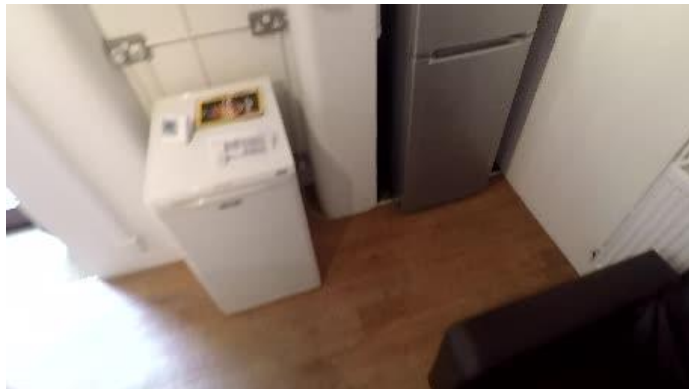

**open fridge**, open drawer, take soy milk, open door, take bottle

$\tau_\alpha=1s$

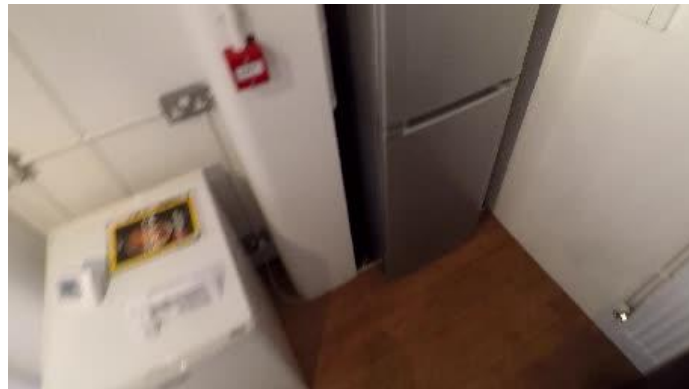

**open fridge**, open drawer, open door, take soy milk, take national geographic

$\tau_\alpha=0.5s$

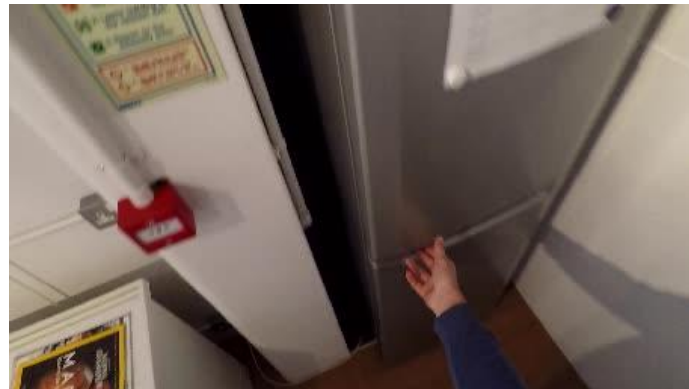

**open fridge**, open drawer, open door, close fridge, turn-on light
