# Supplementary material
Source: ML conference proceedings conference paper supplement (https://www.ecva.net/papers/eccv_2020/papers_ECCV/html/123610154_ECCV_2020_paper.php)
Supplement: Supplementary file 10 [file 123610154-supp.zip]

## GT action: **open salt**

$\tau_\alpha=1.75s$

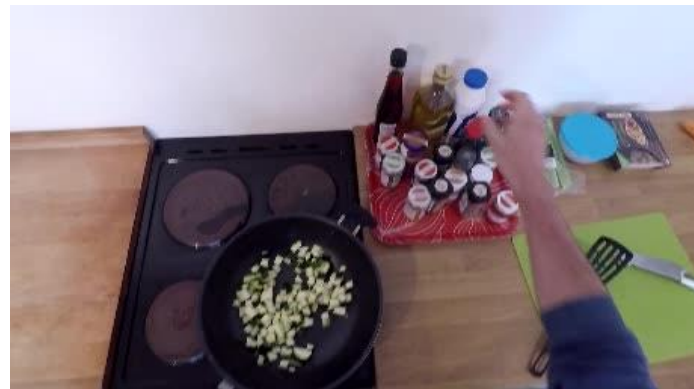

take pepper, take spatula, stir onion, put-down spatula, take onion

$\tau_\alpha=1.25s$

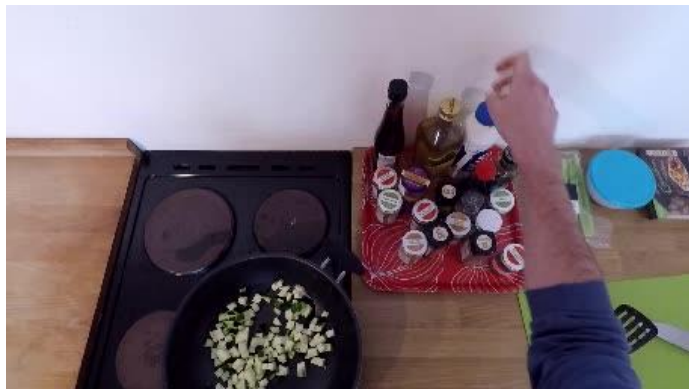

take pepper, stir onion, put-down pepper, open oil, **open salt**

$\tau_\alpha=0.75s$

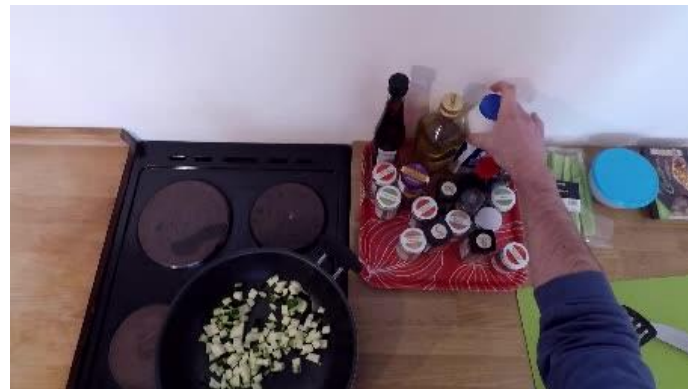

take pepper, **open salt**, put-down, pepper, pour pepper, stir onion

$\tau_\alpha=0.25s$

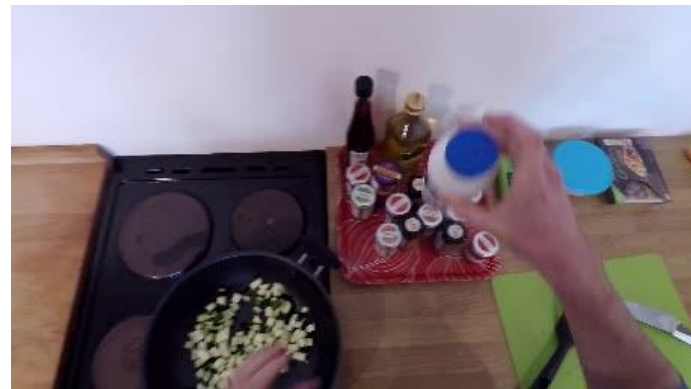

take pepper, **open salt**, put-down salt, take salt, put-down pepper
