# Supplementary material
Source: ML conference proceedings conference paper supplement (https://www.ecva.net/papers/eccv_2020/papers_ECCV/html/123610154_ECCV_2020_paper.php)

Observed %30

Prediction %50

GT

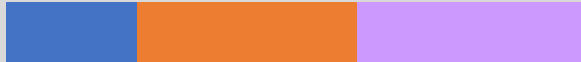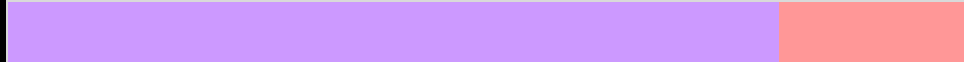

ours, GT labels →

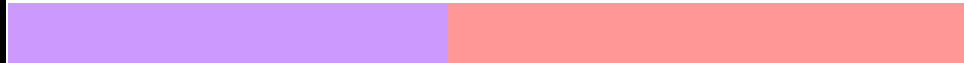

ours, I3D →

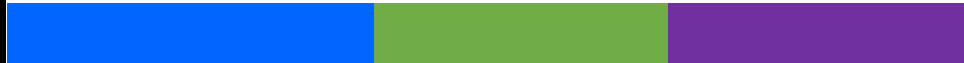

Supplement: Supplementary file 2 [file 123610154-supp.zip]

Observed %30

Prediction %50

GT

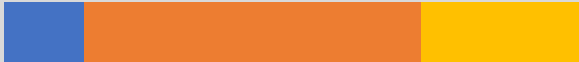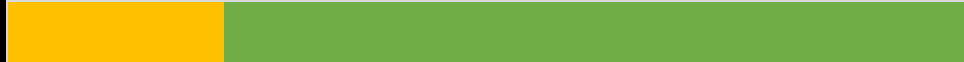

ours, GT labels →

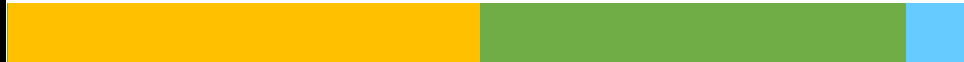

ours, I3D →

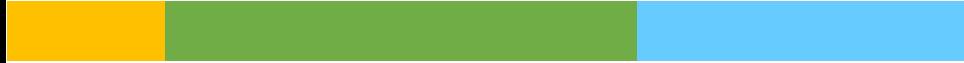

Supplement: Supplementary file 3 [file 123610154-supp.zip]

Observed %30

Prediction %50

GT

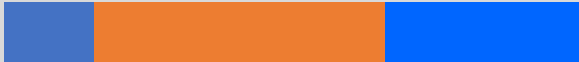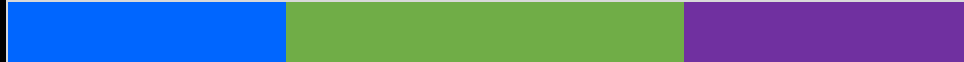

ours, GT labels →

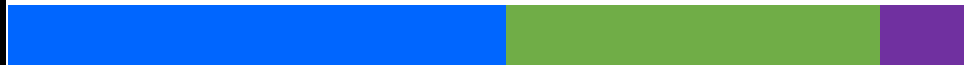

ours, I3D →

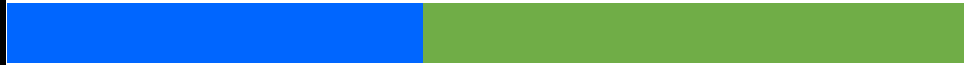

Supplement: Supplementary file 5 [file 123610154-supp.zip]

Observed %30

Prediction %50

GT

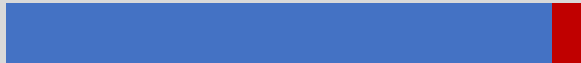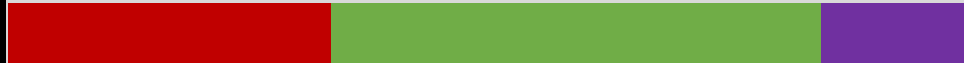

ours, GT labels →

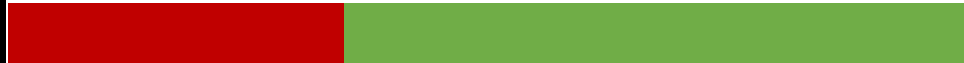

ours, I3D →

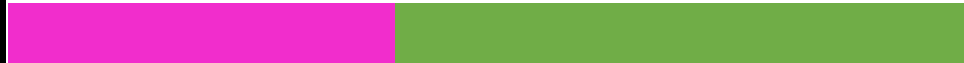

Supplement: Supplementary file 6 [file 123610154-supp.zip]

Observed %30

Prediction %50

GT

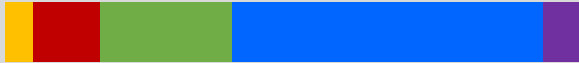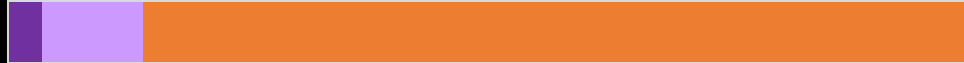

ours, GT labels →

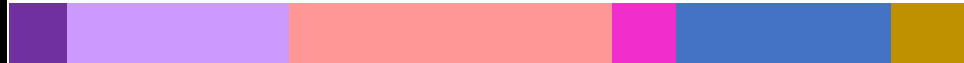

ours, I3D →

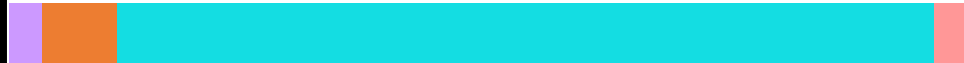

Supplement: Supplementary file 7 [file 123610154-supp.zip]

Observed %30

Prediction %50

GT

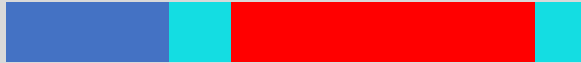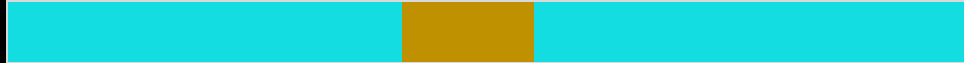

ours, GT labels →

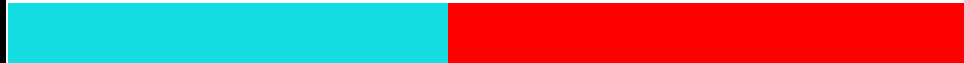

ours, I3D →

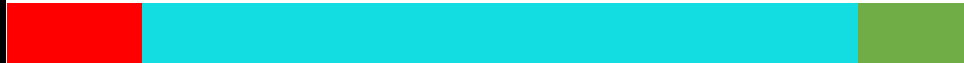

Supplement: Supplementary file 8 [file 123610154-supp.zip]

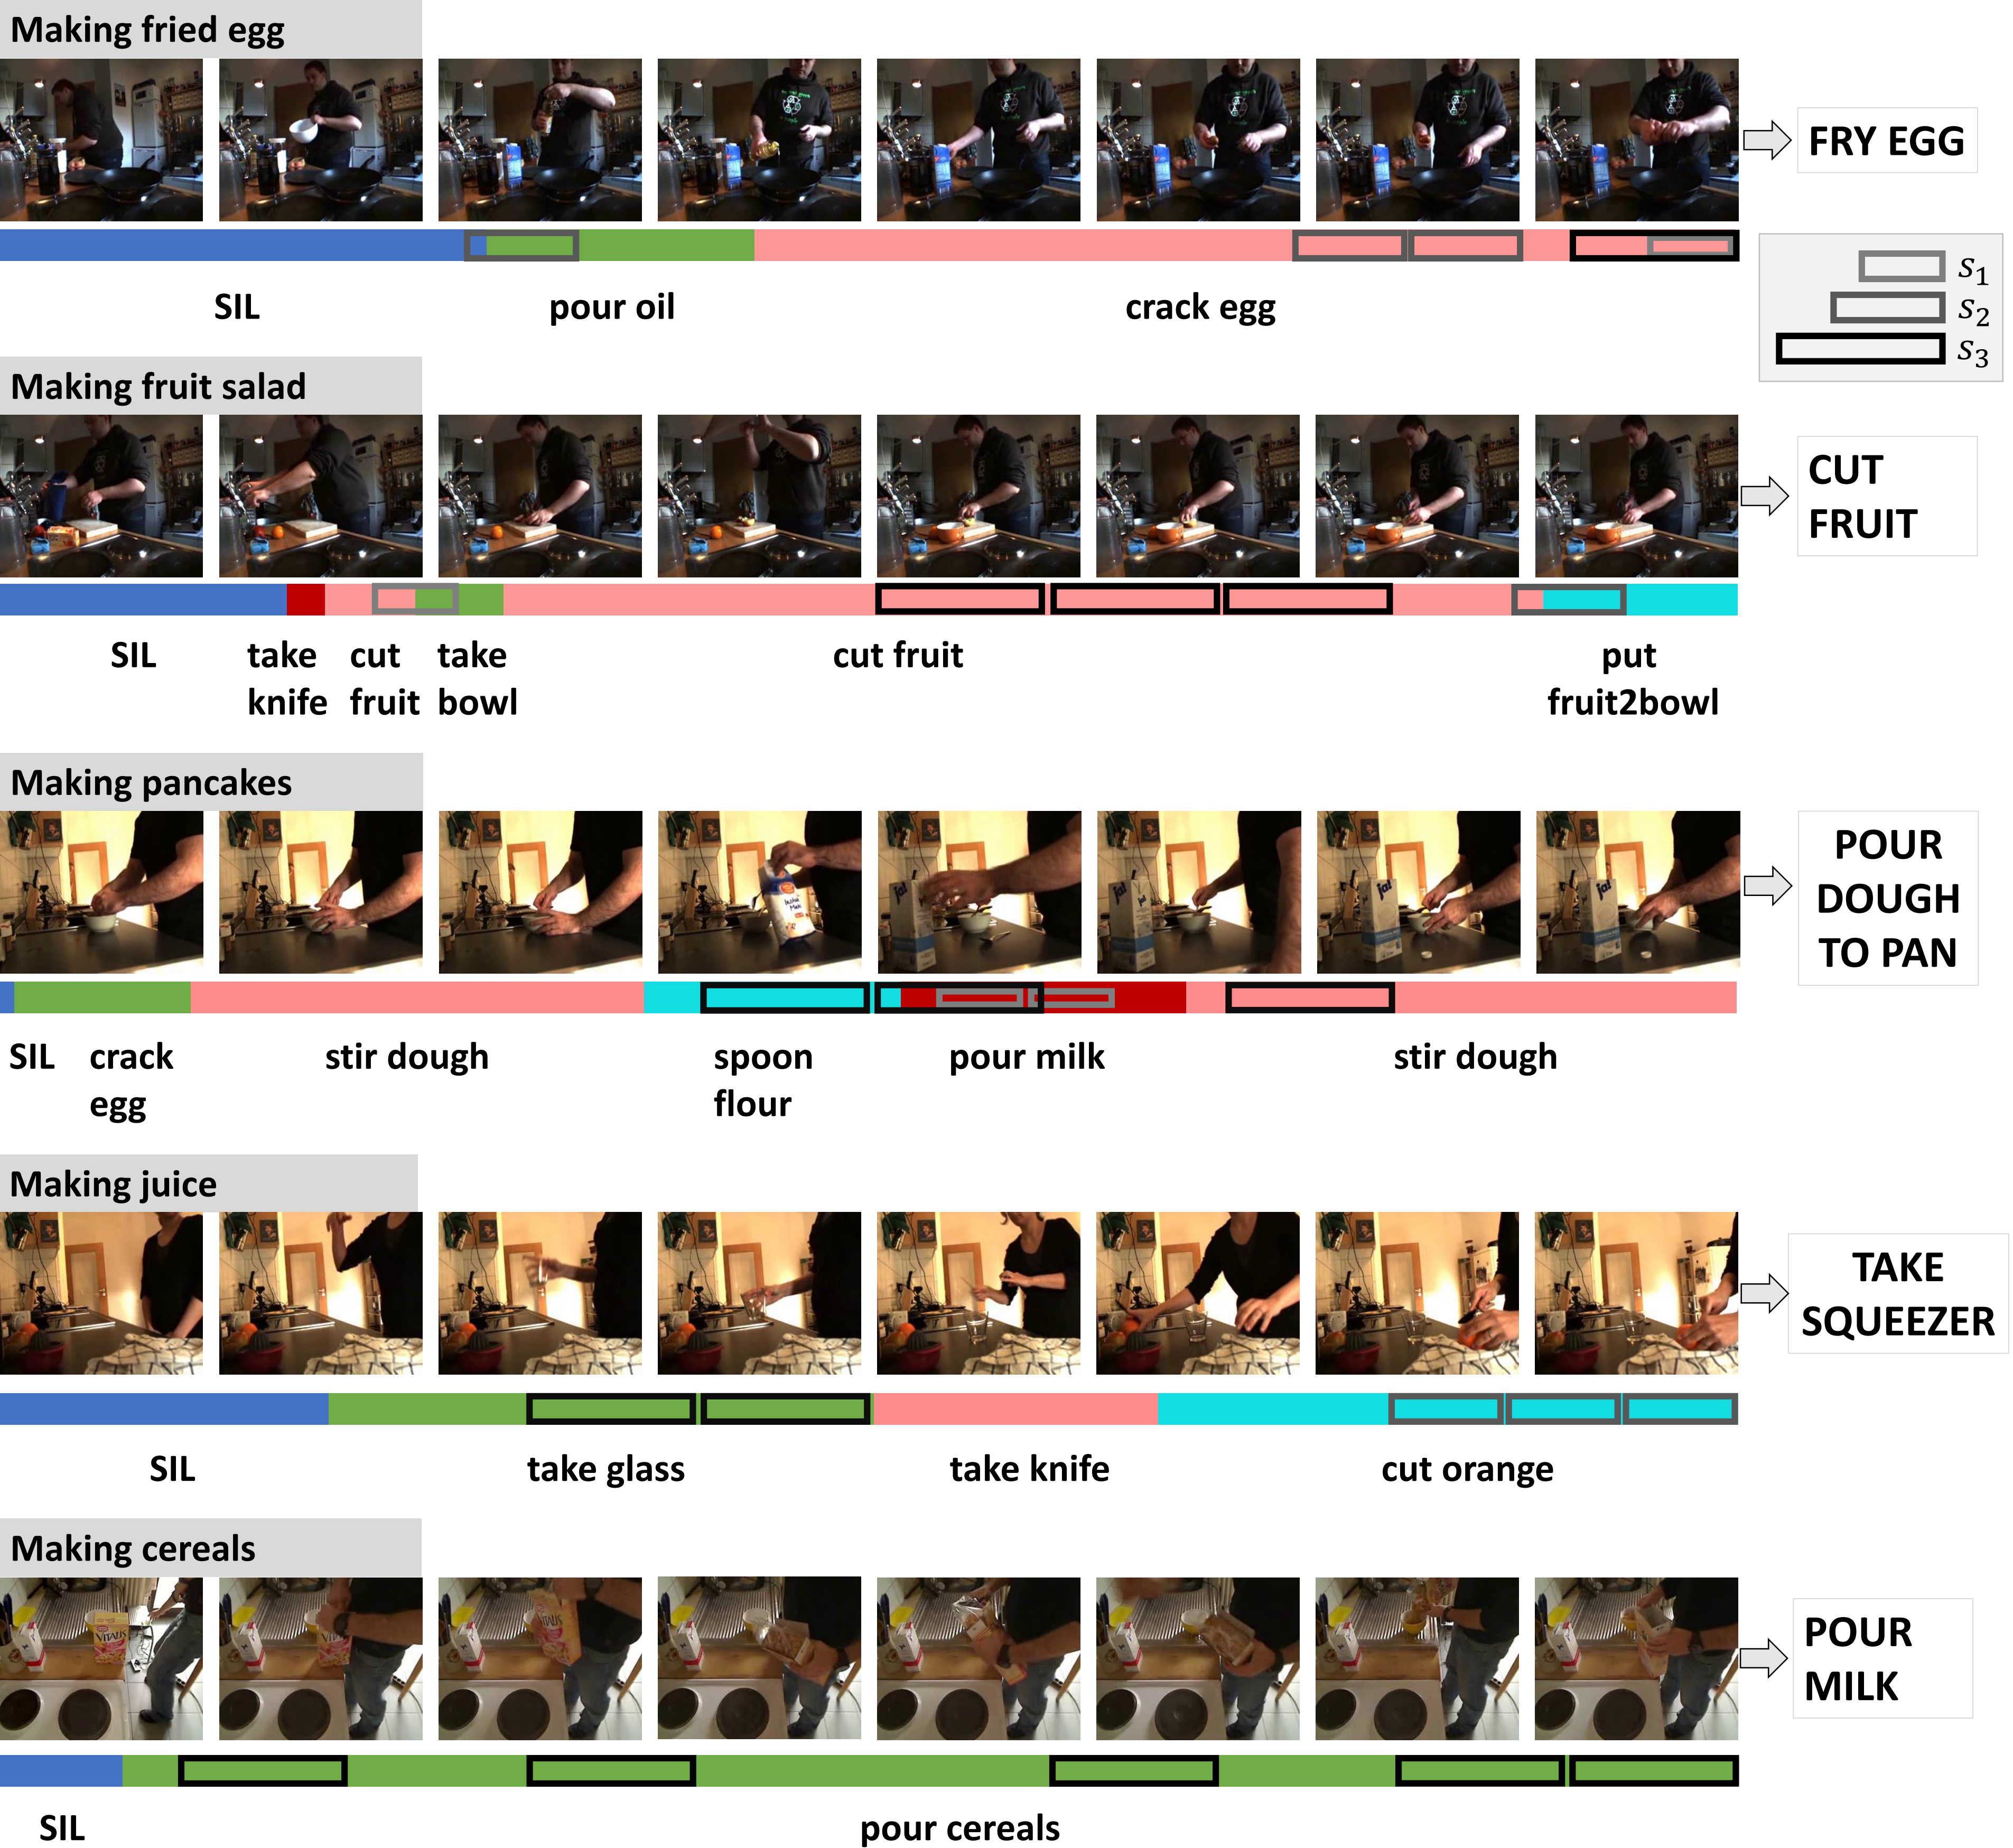

Supplement: Supplementary file 12 [file 123610154-supp.zip]
